# Supplementary material
Source: PubMed Central journal article supplement (PMC4326246)

N. men C311 1 MKRQALAAMIASLFLALAAGGEGPEAAQAAPAETPAAAAEAASAAQTAETPSGELPVIDAV 60  
 N. gon 1291 1 -----MIASLFLALAAGGEGEAQAAPAETPAASAEAAASAAQATAETPAGELPVIDAV 52  
 A. cycloclastes 1 -----AAGAAPV-----DISTLPRVKVLDLVKPP 23  
 A. xylosoxidans 1 -----MNALRPTLLAAALAFMAAG-----TAWAQDADKLPHTKVTLVAPP 41  
 A. faecalis NiR 1 -MAEQMISRRITLAGAALAGALAPVLATTSAWGGQAVRKATAEIAALPRQKVELVDPP 59  
 R. sphaeroides 1 -----MFTRRAALVGAALASAPLVIRTAGAQEAPQLASAAPVDLSNLPRVKHTLVPPP 55  
 \* \* \* \*

N. men C311 61 TTHAPEVPPAIDRDYPAKVRVKMETVEKTMEDG-VEYRYWTFDGDVPGMRMIRVREGDT 119  
 N. gon 1291 53 TTHAPEVPPAIDRDYPAKVRVKMETVEKTMKMDG-VEYRYWTFDGDVPGMRMIRVREGDT 111  
 A. cycloclastes 24 FVHAHDQVAKT---PRVFEFTMIEEKKLVIDREGTEIHAMTFNGSVPGFLMVVHENDY 80  
 A. xylosoxidans 42 QVHPHEQATKSG---PKVVEFTMIEEKKMVIDDKGTTLQAMTFNGSMGPPTLVVHEGDY 98  
 A. faecalis NiR 60 FVHAHSQVAEGG---PKVVEFTMVEEKKIVIDDAGTEVHAMAFNGTVPGPLMVMVHQDDY 116  
 R. sphaeroides 56 FAHAHEQVAASG---PVINEFEMRIIEKEVQLDED-AYLQAMTFDGSIPGPLMIVHEGDY 111  
 \* \* \* \* \* \* \* \*

I # II I I I  
 N. men C311 120 VEVEFSNNPSSTVPHNVDFFHAATGQGGAATFTAPGRSTFSFKALQPGLYIYHCAPAV 179  
 N. gon 1291 112 VEVEFSNNPSSTVPHNVDFFHAATGQGGAATFTAPGRSTFSFKALQPGLYIYHCAPAV 171  
 A. cycloclastes 81 VELRLINPDTNLTLLHNIDFFHAATGALGGGLTVQNPGEITTLRFKATKPGVFVYHCAPEG 140  
 A. xylosoxidans 99 VQLTLVNPATNAMPHNVDFFHGATGALGGAKLTNVNPGEQATLRFKADRSGTFVYHCAPEG 158  
 A. faecalis NiR 117 LELTLINPETNLTLLHNIDFFHAATGALGGGLTEINPGEKITLRFKATKPGVFVYHCAPEG 176  
 R. sphaeroides 112 VELTLINPENTMPPHNIDFFHAATGALGGGLTLINPGEKVVLRFKATRAGAFVYHCAPEG 171  
 ... \* \* \* \* \* \* \* \* \* \* \*

I I  
 N. men C311 180 --VGMHIIANGMYGLILVPEKLELP-----KVDKEFYIVQGDIFYTKGKGAQGLQPFDM 230  
 N. gon 1291 172 --VGMHIVTANGMYGLILVPEKLELP-----KVDKEFYIVQGDIFYTKGKGAQGLQPFDM 222  
 A. cycloclastes 141 --MVPWHIISGMMGAIIMVLPDRDGLKDEKGQPLTYDKIYYVGEQDFYVPKDEAGNYKKYETP 199  
 A. xylosoxidans 159 --MVPWHIVSMMGSLMVLPRDGLKDPQGKPLHYDRAYTIGFDLYIPKPGDGKYKDYATL 217  
 A. faecalis NiR 177 --MVPWHIVSMMGAIIMVLPREGLHDGKGGKALTVDKIYYVGEQDFYVPRDENGYKKYEAPE 235  
 R. sphaeroides 172 PMPWHIVSMMGACIMVLPDRDGLKDHEGKPVRYDTVYYIGESDHYIPKDEDGYMRPSTP 231  
 \* \* \* \* \* \* \* \* \* \*

#  
 N. men C311 231 DKAAVE-----QPEYVFNHGVGAIAGDNALKAKAGETVRMYVGNNGPNLVSSFFHVI 282  
 N. gon 1291 223 DKAAVE-----QPEYVFNHGVGAIAGDNALKAKAGETVRMYVGNNGPNLVSSFFHVI 274  
 A. cycloclastes 200 GEAYEDAVKAMRLTPTSHIVFNGAVGALTDGDHALTAAGVERVVLVHVSQ--ANRDRPHLI 257  
 A. xylosoxidans 218 AESYGDVTVQVMRLLTPSHIVFNGKVGALGANALTAKVGETVLLIHSQ--ANRDRPHLI 275  
 A. faecalis NiR 236 GDAYEDTVKVMRLLTPSHIVFNGAVGALTDGKAMTAAVGEKNVLVHVSQ--ANRDRPHLI 293  
 R. sphaeroides 232 SEGyedMVAVMDTLIPSHIVFNGAVGALTEGEGALKAKVDNVLVHVSQ--PKRDRPHLI 289  
 \* \* \* \* \* \* \* \* \* \*

I I  
 N. men C311 283 GEIFDKVYVEG--GKLINENVQSTIVPAGGSAIVEFKVDIPGSYTLVDHSHIFRAFNGKAL 340  
 N. gon 1291 275 GEIFDKVYVEG--GKLINENVQSTIVPAGGSAIVEFKVDIPGNITLVDHSHIFRAFNGKAL 332  
 A. cycloclastes 258 GGHGDYVWATGKFRNPPDLQETWLPGGTAGAAYFTRFQPGVYAYVNHLIEAFELGAA 317  
 A. xylosoxidans 276 GGHGDVWETGKFNAPQDLETWIFIRGGSAGAALYTFKQPGVYAYVNHLIEAFELGAA 335  
 A. faecalis NiR 294 GGHGDYVWATGKFNTPPVDQETWIFIPGGAAGAAYFTRFQPGVYAYVNHLIEAFELGAA 353  
 R. sphaeroides 290 GGHGDYVWETGKFNAPERDLETWIFIRGGTAGAALYKFLQPGVYAYVNHLIEAVHKGAT 349  
 \* \* \* \* \* \* \* \* \* \*

N. men C311 341 GQLKVEGAENPEIMTQKLSDTAYAGNGAA--PAASAPAASAPAASASEKSVY 390  
 N. gon 1291 333 GQLKVEGAENPEIMTQKLSDTAYAGSNGAA--PAASAPAASAPAASASEKSVY 384  
 A. cycloclastes 318 GHFKVTGEWNDDMLTSVVKPASM----- 340  
 A. xylosoxidans 336 GHIKVEGKWNDDLMKQIKAPAPIR----- 360  
 A. faecalis NiR 354 AHFKVTGEWNDDMLTSLVAPSGT----- 376  
 R. sphaeroides 350 ASVLVGEWDDNLMEQVPPVGLTG----- 374  
 \* \* \* \*

**A**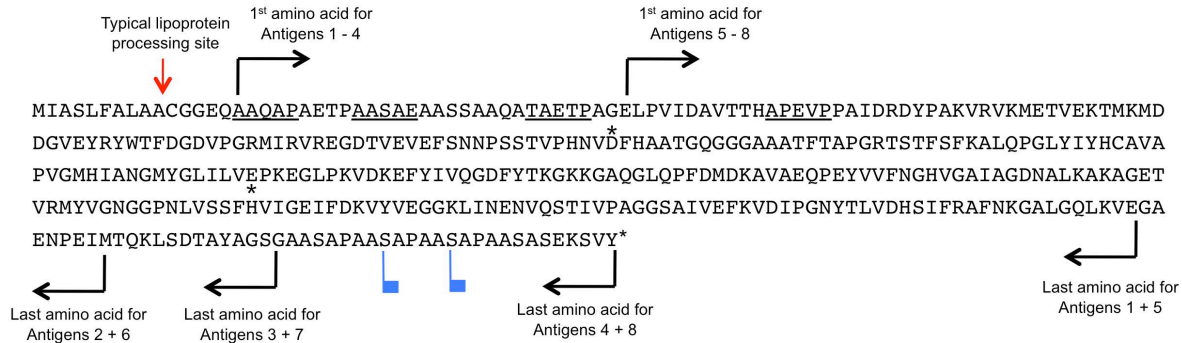**B**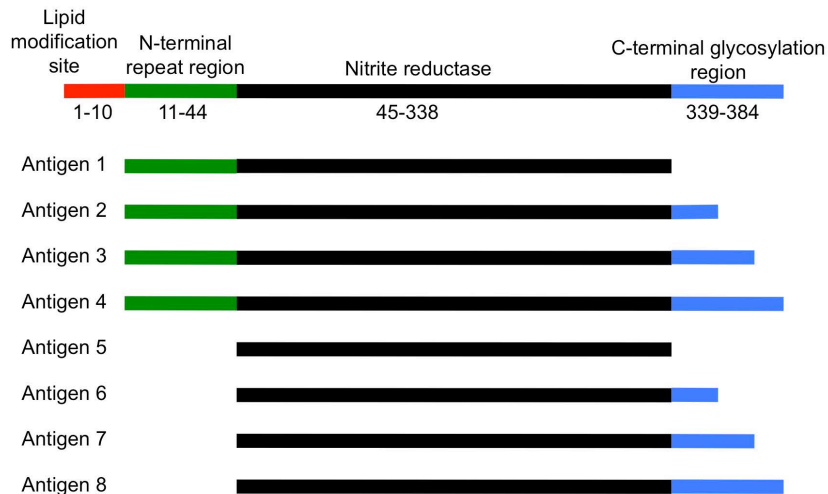

Supplement: NIHMS660950-supplement-supplement_1.pdf [file NIHMS660950-supplement-supplement_1.pdf]
